# Supplementary material
Source: PubMed Central journal article supplement (PMC8525223)
Supplement: advancesADV2020004016-suppl1.pdf [file advancesADV2020004016-suppl1.pdf]

## **Supplementary Materials**

### **Supplementary Methods**

#### *Standardized tissue processing protocol followed in phase II siltuximab trial*

Tissue was stained using the following antibodies: IL-6 (Santa Cruz, SC-7920): polyclonal rabbit IgG, dilution 0.175 ug/ml, incubated overnight, pre-treated with SHIER8, and a Rabbit GBI detection system and pSTAT3 (Cell Signaling, 9131): polyclonal rabbit IgG, dilution 1:250, incubated overnight, pretreated with SHIER7+ enzyme (1:40), and a Rabbit GBI detection system. After staining, slides were dehydrated through an alcohol series to absolute ethanol followed by xylene rinses. Slides were permanently coverslipped with glass coverslips and Cytoseal. Slides were examined under a microscope to assess staining. Positive staining is indicated by the presence of a brown chromogen (DAB-HRP) reaction product. Hematoxylin counterstain provides a blue nuclear stain to assess cell and tissue morphology.

The IHC testing and scoring were performed blinded to the treatment group at QualTek laboratory. Samples were scored as percentage of lymph node cells (0-100% at 10% intervals) and intensity of staining (0-3 with 0 = no staining, 1= low staining, 2=moderate staining, and 3= high staining).

An H-score was determined for each marker for each subcellular localization. The H-score is more representative of the staining of the entire scored areas of interest in the germinal center or mantle zone areas of the lymph node sections. It accounts for the differences between samples with high intensity staining in fewer cells versus low intensity staining in more number of cells. The H-Score (0 to 300 range) was determined by Qualtek laboratory using the following formula, integrating percent positive cells at

each staining intensity score: H-Score = [(% at <1)\*0] + [(% at 1+)\*1] + [(% at 2+)\*2] + [(% at 3+)\*3]. Qualtek Laboratory provided percent positive cells, staining intensity, and H-score for the cytoplasm of IL-6 and the nucleus of p-STAT3 in the germinal center and in the mantle zone and relative score within the interfollicular space for IL-6 only. P-values from a chi-square test for differential expression between responders and non-responders are provided for IL-6 germinal center (H score), mantle zone (H score), and interfollicular space (relative score) as well as pSTAT3 germinal center (H score) and mantle zone (H score).

**Fig. S1.**

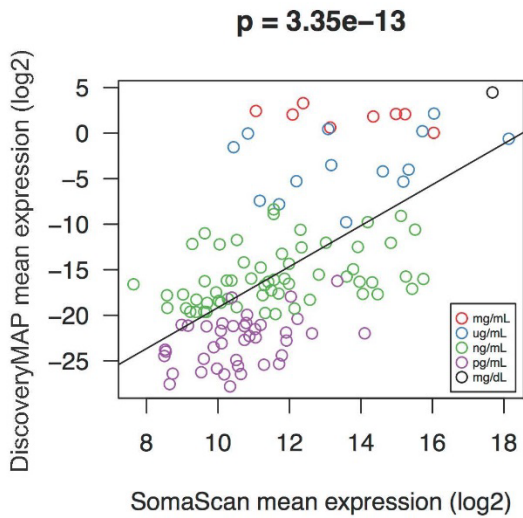

Comparison of analyte levels for those measured by both the Somalogic SOMAScan and RBM DiscoveryMAP platforms. RBM values were converted from the original units (used for coloring) to mg/ml and then log transformed (base 2). Additionally, values below the experimentally determined per-target least detectable dose were truncated to the least detectable dose

**Fig. S2.**

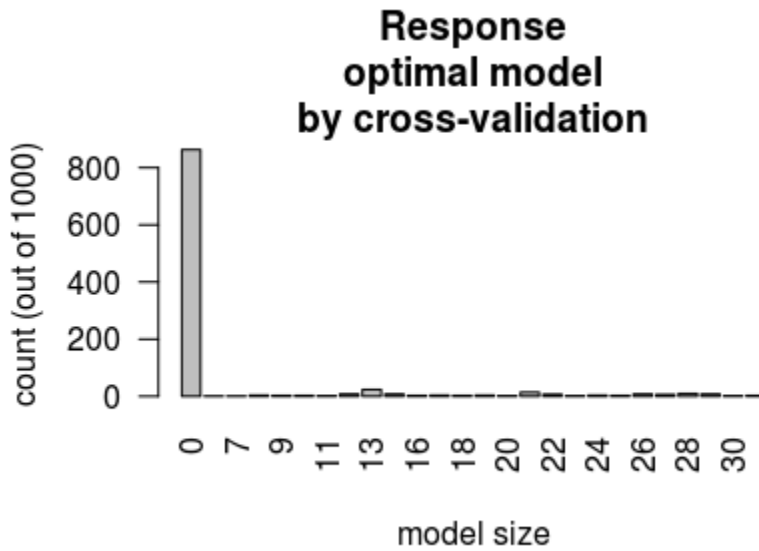

Results from model selection to identify an optimal model that differentiates siltuximab responders from non-responders. An elastic net algorithm and performed 5-fold cross validation was performed 1000 times to determine the fewest proteins present on both discovery and validation platforms that could most effectively predict response in the discovery dataset. The model chosen 863 out of 1000 randomizations had 0 proteins, the model predicting all patients as non-responders, which demonstrates that these data do not support a model that predicts siltuximab responders from the full cohort.

**Fig. S3.**

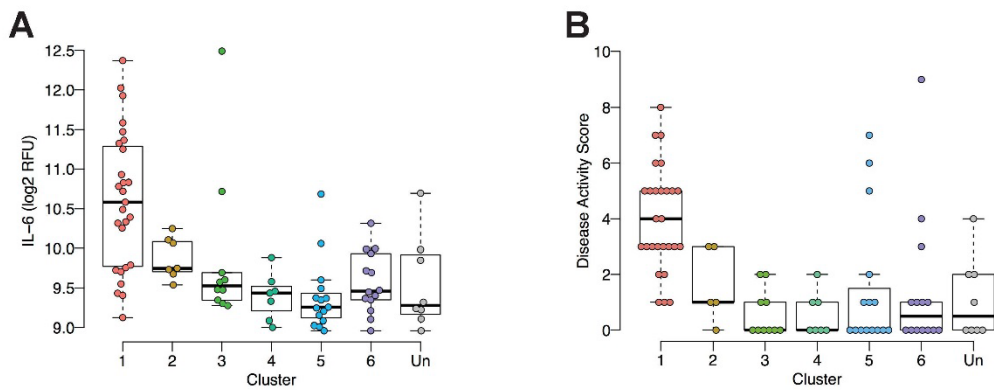

IL-6 and disease activity score by iMCD cluster. (A) IL-6 levels by iMCD cluster as measured by SOMAscan. Units are log<sub>2</sub>(relative fluorescence unit). (B) Disease activity scores by cluster, as measured by a disease activity score, which includes C-reactive protein, hemoglobin, and albumin levels. Box plots show center median, first and third quartile, and whiskers extend to 1.5\*interquartile range.

Fig. S4.

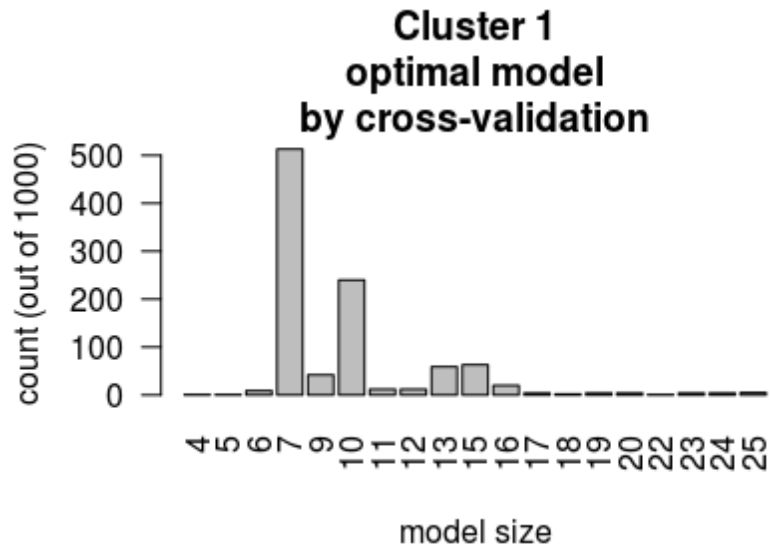

Results from model selection to identify an optimal model that most effectively predicts Cluster-1 membership in the discovery dataset. An elastic net algorithm and performed 5-fold cross validation was performed 1000 times to determine the fewest proteins present on both discovery and validation platforms that could most effectively predict Cluster-1 membership in the discovery dataset. The model chosen 513 out of 1000 randomizations had 7 proteins, and the second most frequently chosen model, 240 out of 1000 randomizations, included 10 proteins.

**Fig S5.**  
**A.**

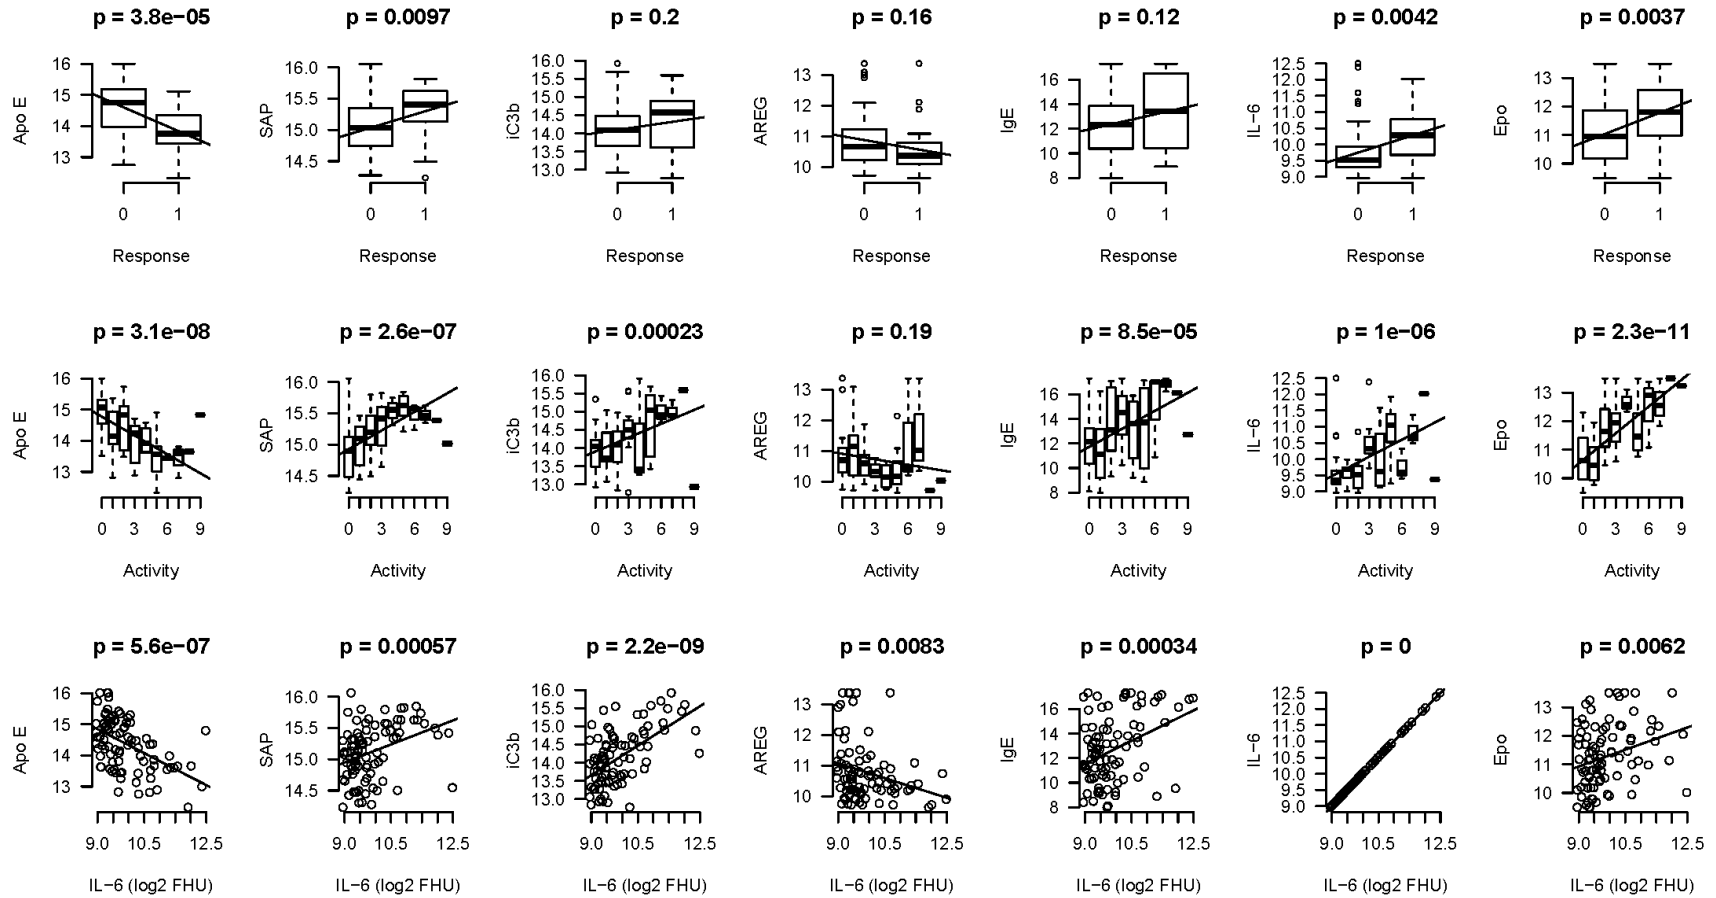

**Fig. S5**  
**B.**

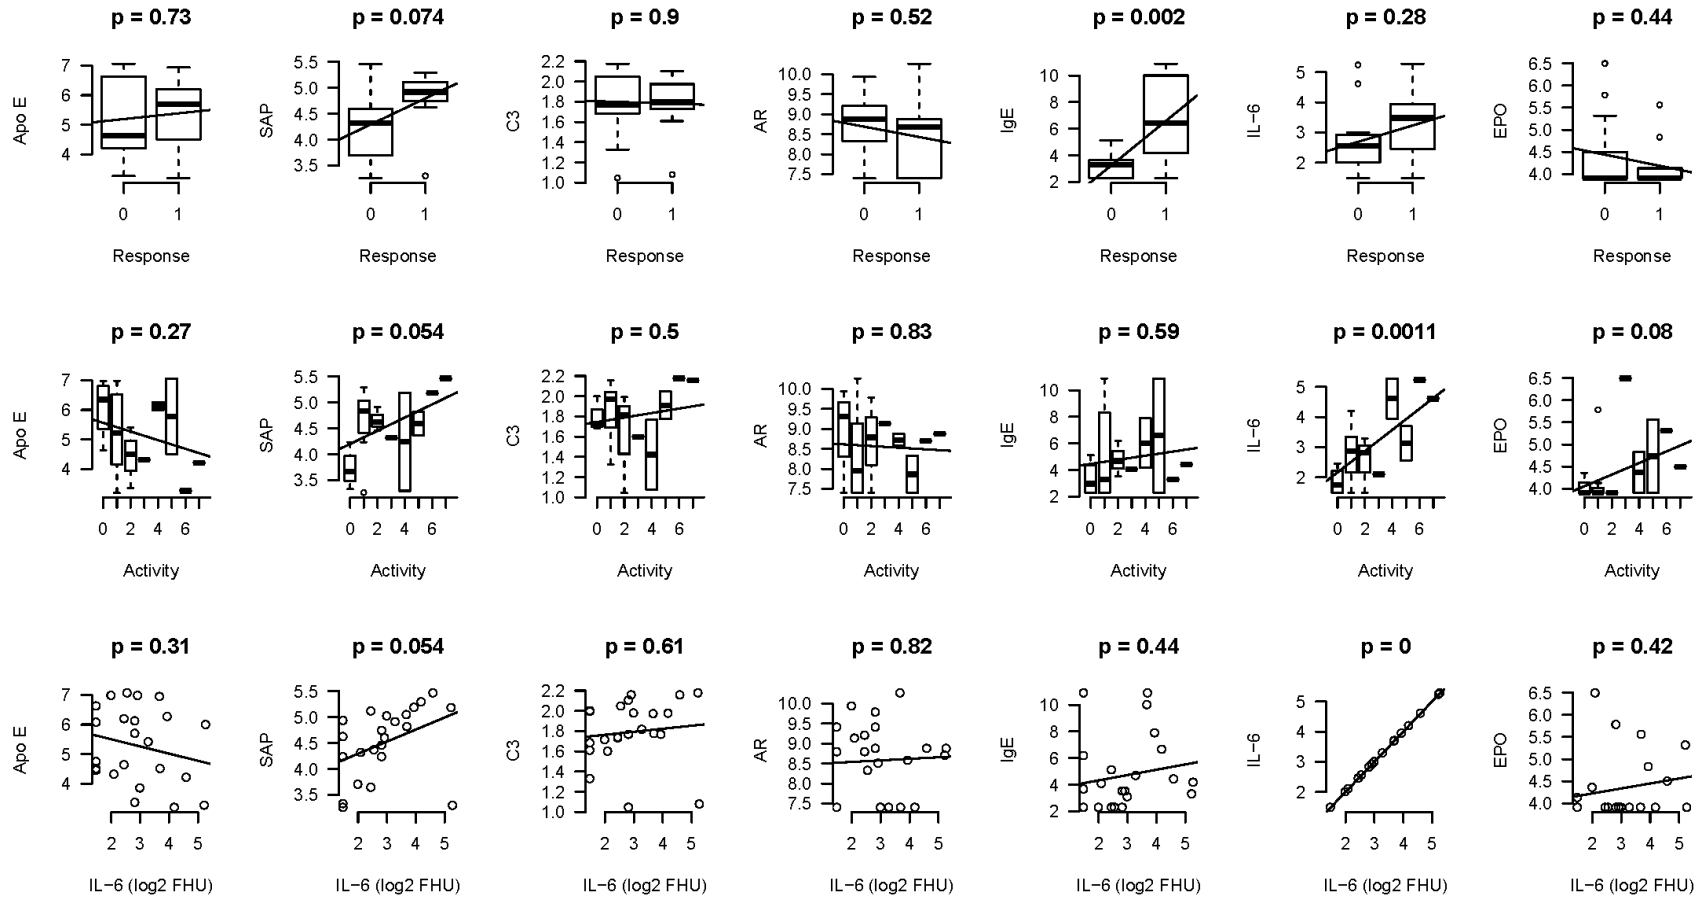

Univariate analysis of each of the 7-proteins included in the Cluster-1 prediction algorithm with each response, disease activity, and serum IL-6 from the (A) discovery cohort and (B) validation cohort.



**Fig. S6**

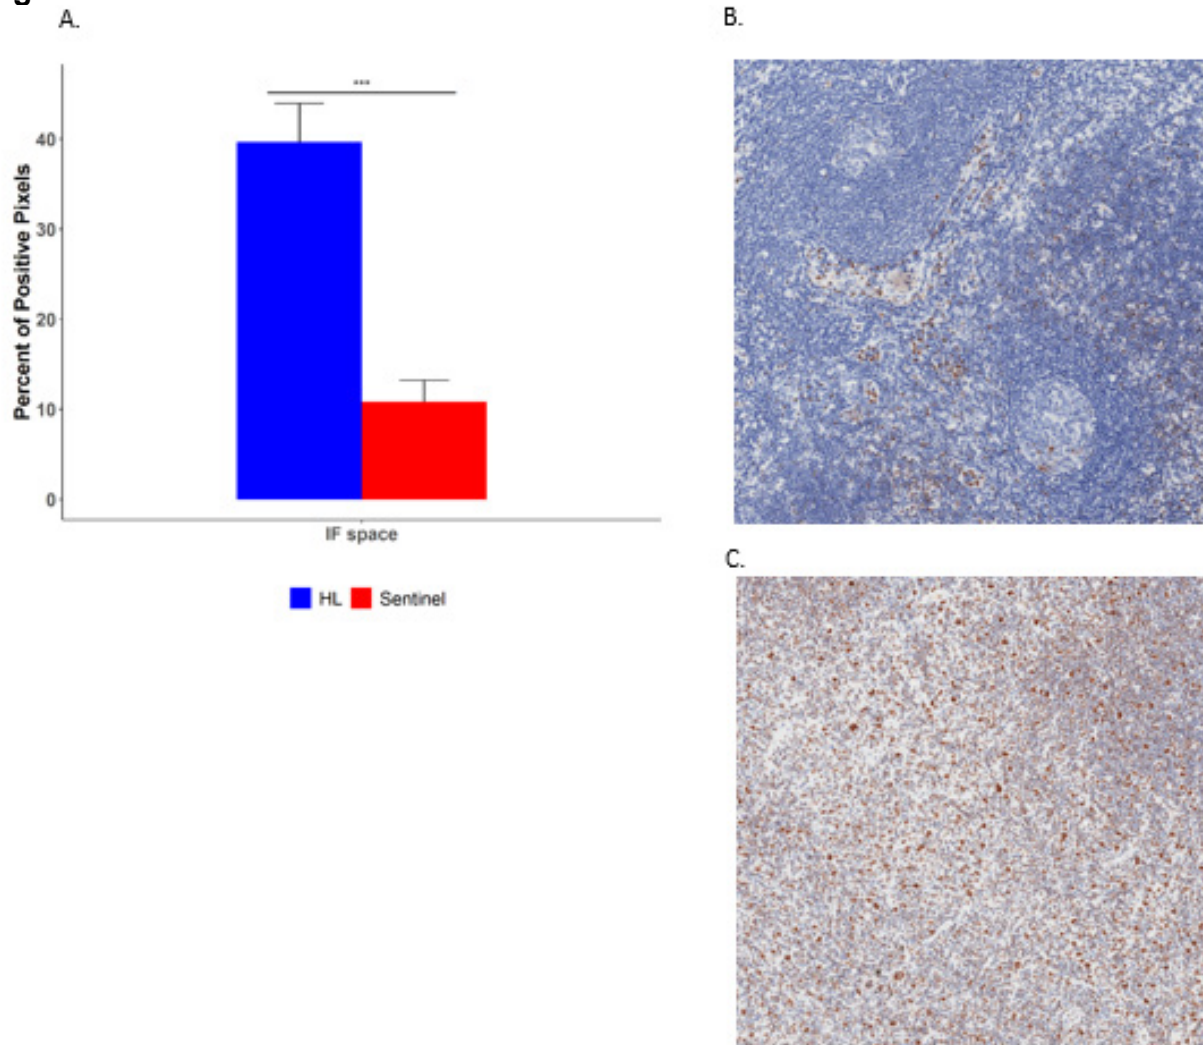

The enrichment of the IL-6 JAK-STAT3 pathway in serum proteomics led us to hypothesize that pSTAT3 would be elevated in iMCD compared to normal control. As a positive validation for the assay, we compared HL to normal lymph nodes. (A) HL lymph nodes demonstrated significantly increased pSTAT3 staining in the interfollicular space compared to normal control lymph nodes ( $p = 0.0002166$ ). Representative images of a (B) normal lymph node and a (C) HL lymph node (40X magnification) are provided.

**Fig. S7.**

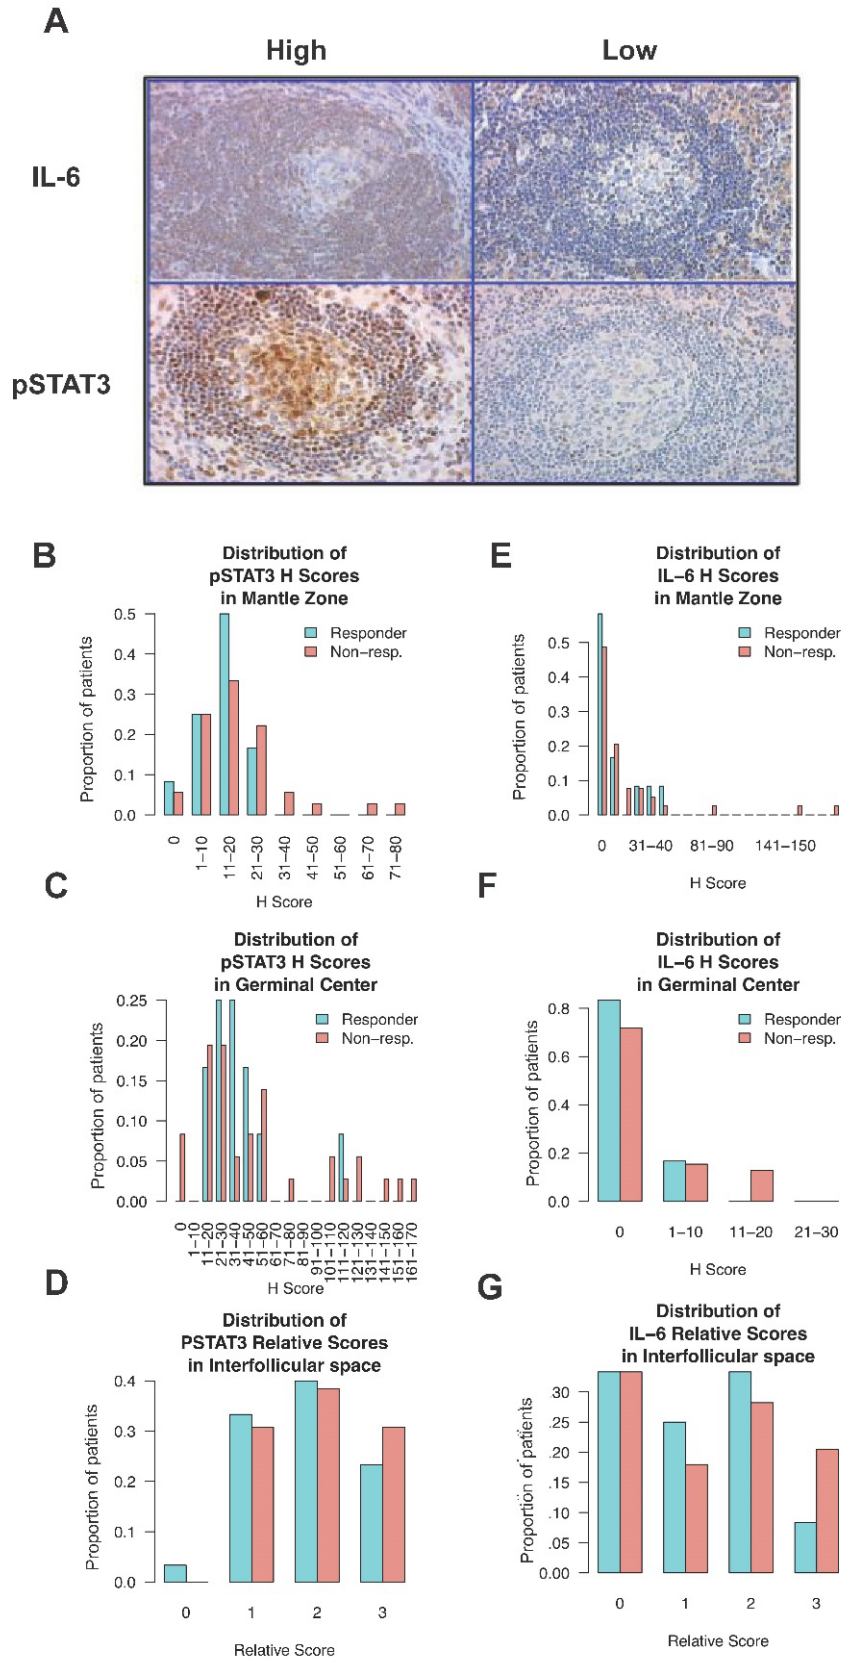

We evaluated IL-6 and pSTAT3 IHC expression in responders and non-responders in the siltuximab treatment arm of the phase II study to investigate potential differences in the IL-6 JAK STAT3 pathway. (A) Immunohistochemistry for IL-6 and pSTAT3 expression in lymph node tissue from 51 and 48 patients, respectively, in the discovery cohort did not reveal significant differences in expression of IL-6 and pSTAT3 between responders and non-responders. Four representative images of patients with high and low expression of IL-6 and pSTAT3 (40X magnification) are provided. (B-G) A summary of immunohistochemistry scores demonstrating no significant differences in the expression of IL-6 in germinal centers ( $p = 0.56$ ), mantle zone ( $p = 0.96$ ), or interfollicular space ( $p = 0.34$ ) or pSTAT3 in germinal centers ( $p = 0.86$ ), interfollicular space ( $p = 1.0$ ), or mantle zone ( $p = 0.98$ ) in anti-IL-6 responders versus non-responders are provided.

**Table S1.** Clinical characteristics of patients included in the study.

|                                                  | Discovery Cohort             |                                    | Validation Cohort |                              |
|--------------------------------------------------|------------------------------|------------------------------------|-------------------|------------------------------|
|                                                  | (Siltuximab Trial)<br>(n=73) | Phase II (Real patients)<br>(n=15) | World iMCD        | (Siltuximab Trial)<br>(n=23) |
| <b>Sex, N(%)</b>                                 |                              |                                    |                   |                              |
| F                                                | 24 (32.9%)                   | 4 (26.7%)                          |                   | 12 (52.2%)                   |
| M                                                | 49 (67.1%)                   | 11 (73.3%)                         |                   | 11 (47.8%)                   |
| <b>Age</b>                                       |                              |                                    |                   |                              |
| Mean (SD)                                        | 52.2 (13.4)                  | 55.7 (13.2)                        |                   | 51.3 (12.1)                  |
| Median [Min, Max]                                | 54.0 [26.0, 85.0]            | 52.0 [34.0, 76.0]                  |                   | 53.00 [24.0, 76.0]           |
| Missing                                          | 7 (9.6%)                     | 0 (0%)                             |                   | 0 (0%)                       |
| <b>Race, N(%)</b>                                |                              |                                    |                   |                              |
| Asian                                            | 37 (50.7%)                   | 3 (20.0%)                          |                   | 2 (8.7%)                     |
| Black                                            | 3 (4.1%)                     | 1 (6.7%)                           |                   | 2 (8.7%)                     |
| White                                            | 26 (35.6%)                   | 9 (60.0%)                          |                   | 19 (82.6%)                   |
| Other                                            | 5 (6.8%)                     | 2 (13.3%)                          |                   | 0 (0%)                       |
| Missing                                          | 2 (2.7%)                     | 0 (0%)                             |                   | 0 (0%)                       |
| <b>Response according to CT assessment, N(%)</b> |                              |                                    |                   |                              |
| Yes                                              | 17 (23.3%)                   | 0 (0%)                             |                   | 10 (43.5%)                   |
| No                                               | 32 (43.8%)                   | 0 (0%)                             |                   | 13 (56.5%)                   |
| Not Assessed (NA)                                | 24 (32.9%)                   | 15(100%)                           |                   | 0 (0%)                       |
| <b>Disease Activity Score</b>                    |                              |                                    |                   |                              |
| Mean (SD)                                        | 1.9 (2.2)                    | 3.4 (2.3)                          |                   | 2.2 (2.2)                    |
| Median [Min, Max]                                | 1.0 [0.0, 8.0]               | 3.0 [1.0, 9.0]                     |                   | 1 [0.0, 8.0]                 |
| Missing                                          | 0 (0.0%)                     | 2 (13.3%)                          |                   | 1 (4.3%)                     |
| <b>CRP, mg/L</b>                                 |                              |                                    |                   |                              |
| Mean (SD)                                        | 37.5 (46.9%)                 | 66.1 (71.0)                        |                   | 45.8 (60.9)                  |
| Median [Min, Max]                                | 13.2 [0.2, 170.0]            | 24.8 [4.6, 189.9]                  |                   | 25.5 [1.0, 260.0]            |
| Missing                                          | 0 (0%)                       | 1 (6.7%)                           |                   | 0 (0%)                       |
| <b>Hemoglobin, g/dL</b>                          |                              |                                    |                   |                              |
| Mean (SD)                                        | 12.1 (2.5)                   | 10.3 (2.0)                         |                   | 11.9 (2.3)                   |
| Median [Min, Max]                                | 12.3 [6.5, 18.1]             | 10.1 [7.1, 14.4]                   |                   | 12.0 [7.6, 16.6]             |
| <b>Albumin, g/dL</b>                             |                              |                                    |                   |                              |

|                    |                         |                        |                        |
|--------------------|-------------------------|------------------------|------------------------|
| Mean (SD)          | 3.5 (0.7)               | 3.0 (0.7)              | 3.5 (0.7)              |
| Median [Min, Max]  | 3.6 [1.5, 4.9]          | 2.8 [1.5, 4.0]         | 3.6 [2.2, 4.9]         |
| Missing            | 0 (0%)                  | 1 (6.7%)               | 1 (4.3%)               |
| <b>IL-6, pg/mL</b> |                         |                        |                        |
| Mean (SD)          | 0.7 (0.8)               | 5.3 (6)                | 16.9 (21.9)            |
| Median [Min, Max]  | 0.6 [0.0, 4.0]          | 2.3 [0.5, 17.5]        | 4.9 [4.9,4.9 ]         |
| Missing            | 6 (8.2%)                | 3 (20.0%)              | 1 (4.3%)               |
| <b>IgA, mg/dL</b>  |                         |                        |                        |
| Mean (SD)          | 371.4 (227.9)           | 294.4 (198.7)          | 394.9 (302.8)          |
| Median [Min, Max]  | 310 [0.0, 1000.0]       | 284.0 [30.0, 770.0]    | 297.0 [36.0, 1000.0]   |
| Missing            | 0 (0%)                  | 5 (33.3%)              | 0 (0%)                 |
| <b>IgG, mg/dL</b>  |                         |                        |                        |
| Mean (SD)          | 2674.2 (2201.5)         | 1683.9 (942.3)         | 2031.4 (1574.7)        |
| Median [Min, Max]  | 1670.0 [472.0, 10800.0] | 1595.0 [341.0, 3340.0] | 1440.0 [464.0, 6202.0] |
| Missing            | 0 (0%)                  | 5 (33.3%)              | 0 (0%)                 |

\*Note: One outlier IL-6 value was removed as per the clinical study report for the Siltuximab phase II trial

**Table S2.** Demographic characteristics of iMCD patients included in pSTAT3 IHC

|                         | <b>pSTAT3 IHC cohort</b> |
|-------------------------|--------------------------|
|                         | <b>(n=10)</b>            |
| <b>Sex, N(%)</b>        |                          |
| F                       | 5 (50.0%)                |
| M                       | 5 (50.0%)                |
| <b>Age</b>              |                          |
| Mean (SD)               | 52.2 (13.4)              |
| Median [Min, Max]       | 54.0 [26.0, 85.0]        |
| Missing                 | 7 (9.6%)                 |
| <b>Race, N(%)</b>       |                          |
| American Indian         | 1 (10.0%)                |
| Asian                   | 1 (10.0%)                |
| White                   | 6 (60.0%)                |
| Other                   | 1 (10.0%)                |
| Missing                 | 1 (10.0%)                |
| <b>CRP, mg/L</b>        |                          |
| Mean (SD)               | 44.3 (49.3)              |
| Median [Min, Max]       | 28.5 [4.0, 116.0]        |
| Missing                 | 6 (60.0%)                |
| <b>Hemoglobin, g/dL</b> |                          |
| Mean (SD)               | 8.0 (2.0)                |
| Median [Min, Max]       | 7.0 [6.1, 11.3]          |
| Missing                 | 3 (30.0%)                |
| <b>Albumin, g/dL</b>    |                          |
| Mean (SD)               | 2.3 (0.8)                |
| Median [Min, Max]       | 1.95 [1.4, 3.6]          |
| Missing                 | 3 (30.0%)                |
| <b>IgA, mg/dL</b>       |                          |
| Mean (SD)               | 160.7 (81.7)             |
| Median [Min, Max]       | 121 [54.0, 261.0]        |
| Missing                 | 3 (30.0%)                |
| <b>IgG, mg/dL</b>       |                          |
| Mean (SD)               | 1560.9 (855.2)           |

|                   |                        |
|-------------------|------------------------|
| Median [Min, Max] | 1372.0 [585.0, 3264.0] |
| Missing           | 3 (30.0%)              |

**Table S3.**

| Statistical tests and results                                                                     |                |                |                    |           |
|---------------------------------------------------------------------------------------------------|----------------|----------------|--------------------|-----------|
| <b>iMCD is a heterogeneous disorder compared to related inflammatory and neoplastic disorders</b> |                |                |                    |           |
|                                                                                                   | Test           | Test statistic | Degrees of freedom | P-value   |
| iMCD cluster v Race                                                                               | Chi-squared    | 34.229         | 30                 | 0.2718    |
| iMCD cluster v Site                                                                               | Chi-squared    | 53.769         | 24                 | 0.0004575 |
| iMCD cluster v Sex                                                                                | Chi-squared    | 5.8797         | 6                  | 0.4368    |
| iMCD cluster v Corticosteroids at Baseline                                                        | Chi-squared    | 6.5995         | 6                  | 0.3595    |
| iMCD cluster v Prednisone at Baseline                                                             | Chi-squared    | 3.7003         | 6                  | 0.7172    |
| iMCD cluster v Prednisolone at Baseline                                                           | Chi-squared    | 7.021          | 6                  | 0.3189    |
| iMCD cluster v Hydrocortisone at Baseline                                                         | Chi-squared    | 4.8558         | 6                  | 0.5624    |
| iMCD cluster v Prior antineoplastics                                                              | Fisher exact p | NA             | NA                 | 0.4334    |
| iMCD cluster v Prior immunosuppressants                                                           | Fisher exact p | NA             | NA                 | 0.8408    |
| iMCD cluster v Prior corticosteroids                                                              | Fisher exact p | NA             | NA                 | 0.7067    |
| <b>Identification of a novel iMCD subgroup with a superior response to siltuximab</b>             |                |                |                    |           |
| iMCD C1 v Activity (not including unclustered)                                                    | F-statistic    | 37.4           | 1, 76              | 3.854e-08 |
| iMCD C1 v Activity (incl. unclustered)                                                            | F-statistic    | 41.48          | 1, 84              | 7.062e-09 |
| iMCD C1 v Soma IL-6 (not including unclustered)                                                   | F-statistic    | 38.17          | 1, 78              | 2.742e-08 |
| iMCD C1 v Soma IL-6 (including unclustered)                                                       | F-statistic    | 41.88          | 1, 86              | 5.709e-09 |
| iMCD C1 v Response (not including unclustered)                                                    | F-statistic    | 11.75          | 1, 42              | 0.001376  |
| iMCD C1 v Response (including unclustered)                                                        | F-statistic    | 12.58          | 1, 42              | 0.0008944 |
| <b>Validation of a novel subgroup of iMCD with a superior response to siltuximab</b>              |                |                |                    |           |
| Mean expression Soma v RBM                                                                        | F-statistic    | 66.82          | 1, 121             | 3.351e-13 |
| C1 score v Response (discovery)                                                                   | F-statistic    | 20.67          | 1, 75              | 2.051e-05 |
| C1 score vs Activity (discovery)                                                                  | F-statistic    | 62.56          | 1, 88              | 7.085e-12 |
| C1 score v Clinical IL-6 (discovery)                                                              | F-statistic    | 24.74          | 1, 85              | 3.375e-06 |
| C1 score v Soma IL-6 (discovery)                                                                  | F-statistic    | 61.89          | 1, 90              | 7.656e-12 |
| C1 score v Response (validation)                                                                  | F-statistic    | 2.216          | 1, 21              | 0.1514    |
| C1 score v Response (validation), one-sided                                                       | t-statistic    | 1.488          | 21                 | 0.0757    |
| C1 score vs Activity (validation)                                                                 | F-statistic    | 1.860          | 1, 20              | 0.07765   |
| C1 score vs Activity (validation), one-sided                                                      | t-statistic    | 3.46           | 21                 | 0.0385    |
| C1 score v IL-6 (validation)                                                                      | F-statistic    | 3.118          | 1, 21              | 0.09196   |
| C1 score v IL-6 (validation), one-sided                                                           | t-statistic    | 1.766          | 21                 | 0.0460    |
| Response v predicted response (validation of prior predictive algorithm)                          | Z-statistic    | 0.705          | 21                 | 0.481     |
| <b>Identification of JAK-STAT3 as a candidate driver pathway in siltuximab non-responders</b>     |                |                |                    |           |



|                                                                                   |                              |      |    |                        |
|-----------------------------------------------------------------------------------|------------------------------|------|----|------------------------|
| Siltuximab responders v non responders (IL-6 expression in germinal centers)      | Fisher exact p               | NA   | NA | 0.56                   |
| Siltuximab responders v non responders (IL-6 expression in mantle zone)           | Fisher exact p               | NA   | NA | 0.96                   |
| Siltuximab responders v non responders (IL-6 expression in interfollicular space) | Fisher exact p               | NA   | NA | 0.34                   |
| Siltuximab responders v non responders (pSTAT3 expression in germinal centers)    | Fisher exact p               | NA   | NA | 0.86                   |
| Siltuximab responders v non responders (pSTAT3 expression in mantle zone)         | Fisher exact p               | NA   | NA | 0.98                   |
| Cluster 1 responder v healthy donor (TNFa signaling via NFkB)                     | Normalized enrichment score* | 1.68 | NA | p = 0.004<br>q = 0.090 |
| Cluster 1 responder v healthy donor (Estrogen Response Early)                     | Normalized enrichment score  | 1.59 | NA | p = 0.013<br>q = 0.137 |
| Cluster 1 responder v healthy donor (IFN gamma response)                          | Normalized enrichment score  | 1.51 | NA | p = 0.033<br>q = 0.149 |
| Cluster 1 responder v healthy donor (Allograft Rejection Signature)               | Normalized enrichment score  | 1.47 | NA | p = 0.033<br>q = 0.167 |
| Cluster 1 responder v healthy donor (IL-6 JAK STAT3 Signaling)                    | Normalized enrichment score  | 1.52 | NA | p = 0.020<br>q = 0.184 |
| Non-responder v healthy donor (KRAS Signaling up)                                 | Normalized enrichment score  | 1.54 | NA | p = 0.029<br>q = 0.118 |
| Non-responder v healthy donor (IL-6 JAK STAT3 Signaling)                          | Normalized enrichment score  | 1.54 | NA | p = 0.031<br>q = 0.144 |
| Non-responder v healthy donor (TNFa signaling via NFkB)                           | Normalized enrichment score  | 1.66 | NA | p = 0.006<br>q = 0.173 |
| Non-responder v healthy donor (Allograft Rejection Signature)                     | Normalized enrichment score  | 1.42 | NA | p = 0.043<br>q = 0.177 |
| Non-responder v healthy donor (IL2 STAT5 Signaling)                               | Normalized enrichment score  | 1.55 | NA | p = 0.018<br>q = 0.179 |

\*Normalized Enrichment Score = actual Enrichment score / mean (Enrichment scores against all permutations of the dataset). Enrichment score is calculated by calculating a running sum statistic over a ranked list of genes, increasing when a gene is in the gene set and decreasing when not

**Table S4:** Frequencies of each disease group within each cluster.

|                                | <b>Cluster A</b> | <b>Cluster B</b> | <b>Cluster C</b> | <b>Cluster D</b> | <b>Cluster E</b> | <b>Unclustered</b> |
|--------------------------------|------------------|------------------|------------------|------------------|------------------|--------------------|
| <b>iMCD</b>                    | 5 (5.7)          | 18 (20.4)        | 11 (12.5)        | 22 (25)          | 20 (22.3)        | 12 (12.6)          |
| <b>Cluster 1</b>               | 0                | 0                | 0                | 22 (81.4)        | 0                | 5 (18.5)           |
| <b>Cluster 2</b>               | 0                | 0                | 7 (100)          | 0                | 0                | 0                  |
| <b>Cluster 3</b>               | 0                | 0                | 0                | 0                | 10 (100)         | 0                  |
| <b>Cluster 4</b>               | 0                | 0                | 0                | 0                | 7 (100)          | 0                  |
| <b>Cluster 5</b>               | 0                | 15 (100)         | 0                | 0                | 0                | 0                  |
| <b>Cluster 6</b>               | 5 (35.7)         | 3 (21.4)         | 0                | 0                | 0                | 6 (42.8)           |
| <b>Unclustered</b>             | 0                | 0                | 4 (50)           | 0                | 3 (37.5)         | 1 (12.5)           |
| <b>Hodgkin lymphoma</b>        | 0                | 0                | 0                | 19 (95)          | 0                | 1 (5)              |
| <b>Rheumatoid arthritis</b>    | 19 (95)          | 0                | 0                | 0                | 1 (5)            | 0                  |
| <b>HHV8-associated<br/>MCD</b> | 17 (85)          | 2 (10)           | 0                | 0                | 0                | 1 (5)              |

**Table S5.** Example FDA-approved drugs that can inhibit the enriched pathways along with their previously reported uses in iMCD.

| Pathway                                               | Drug         | Use in iMCD | Response |
|-------------------------------------------------------|--------------|-------------|----------|
| TNF $\alpha$ signaling via NF $\kappa$ B              | Etanercept   | 1           | 0/1      |
|                                                       | Adalimumab   | 0           | 0/0      |
|                                                       | Infliximab   | 0           | 0/0      |
|                                                       | Golimumab    | 0           | 0/0      |
|                                                       | Certolizumab | 0           | 0/0      |
| IL-6 JAK-STAT3 Signaling                              | Ruxolitinib  | 0           | 0/0      |
|                                                       | Tofacitinib  | 0           | 0/0      |
|                                                       | Upadacitinib | 0           | 0/0      |
|                                                       | Fedratinib   | 0           | 0/0      |
| IFN gamma response                                    | Emapalumab   | 0           | 0/0      |
| IL2 STAT5 Signaling                                   | Basiliximab  | 0           | 0/0      |
| IL2 STAT5 Signaling AND Allograft Rejection Signature | Cyclosporin  | 10          | 4/7      |
|                                                       | Tacrolimus   | 2           | 2/2      |
| Allograft Rejection Signature                         | Sirolimus    | 3           | 3/3      |
| KRAS Signaling Up                                     | N/A          | N/A         | N/A      |

\* 3 not assessable due to adverse event(s)
